# Supplementary material for: Toll-like Receptors and Cytokine Modulation by Goat Milk Extracellular Vesicles in a Model of Intestinal Inflammation
Source: MDPI journal article supplement (doi:10.3390/ijms241311096), 2023-07-04
Supplement: s1 [file s1]

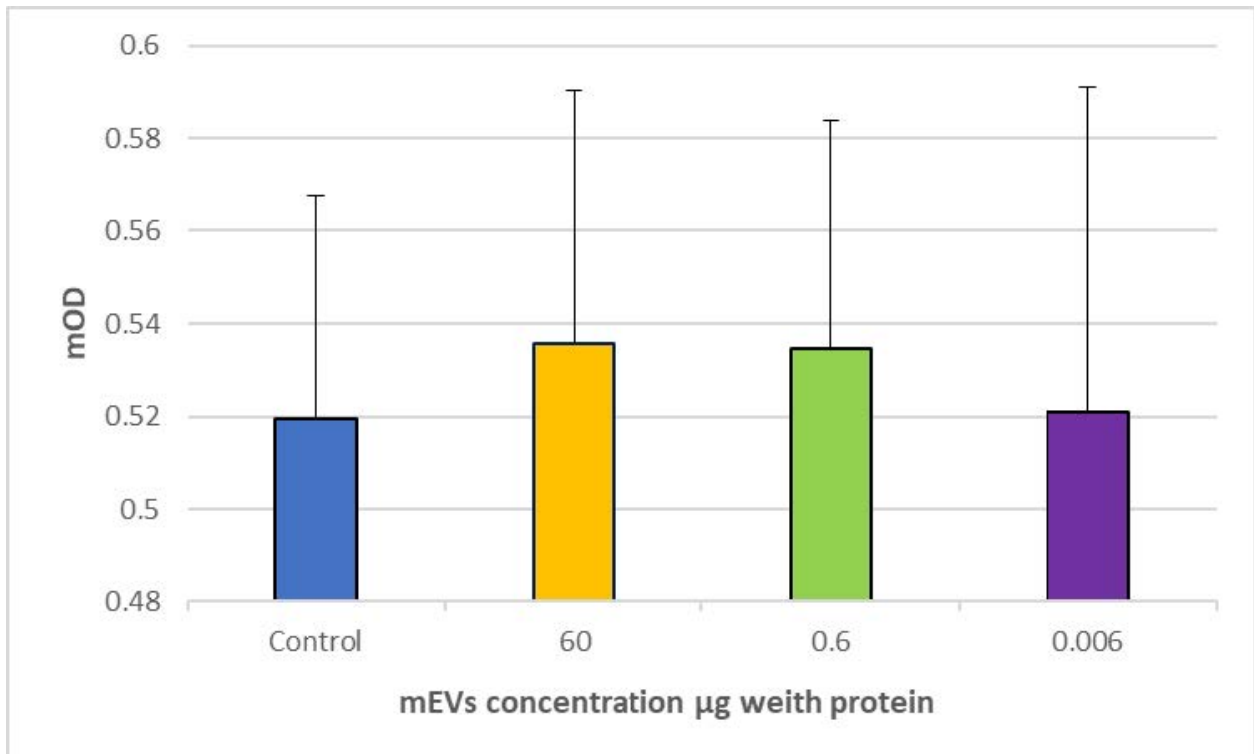

**Figure S1.** Viability of IPEC-J2 after mEVs exposure at 48h. The different concentrations of mEVs did not determine a significant difference in terms of cell viability after 48 h of treatment. Data are expressed as optical density (OD)  $\pm$  SD. Differences were evaluated through the Kruskal-Wallis test and applying the post-doc Dunn's Multiple Comparison Test. Statistical significance:  $p < 0.05$ .

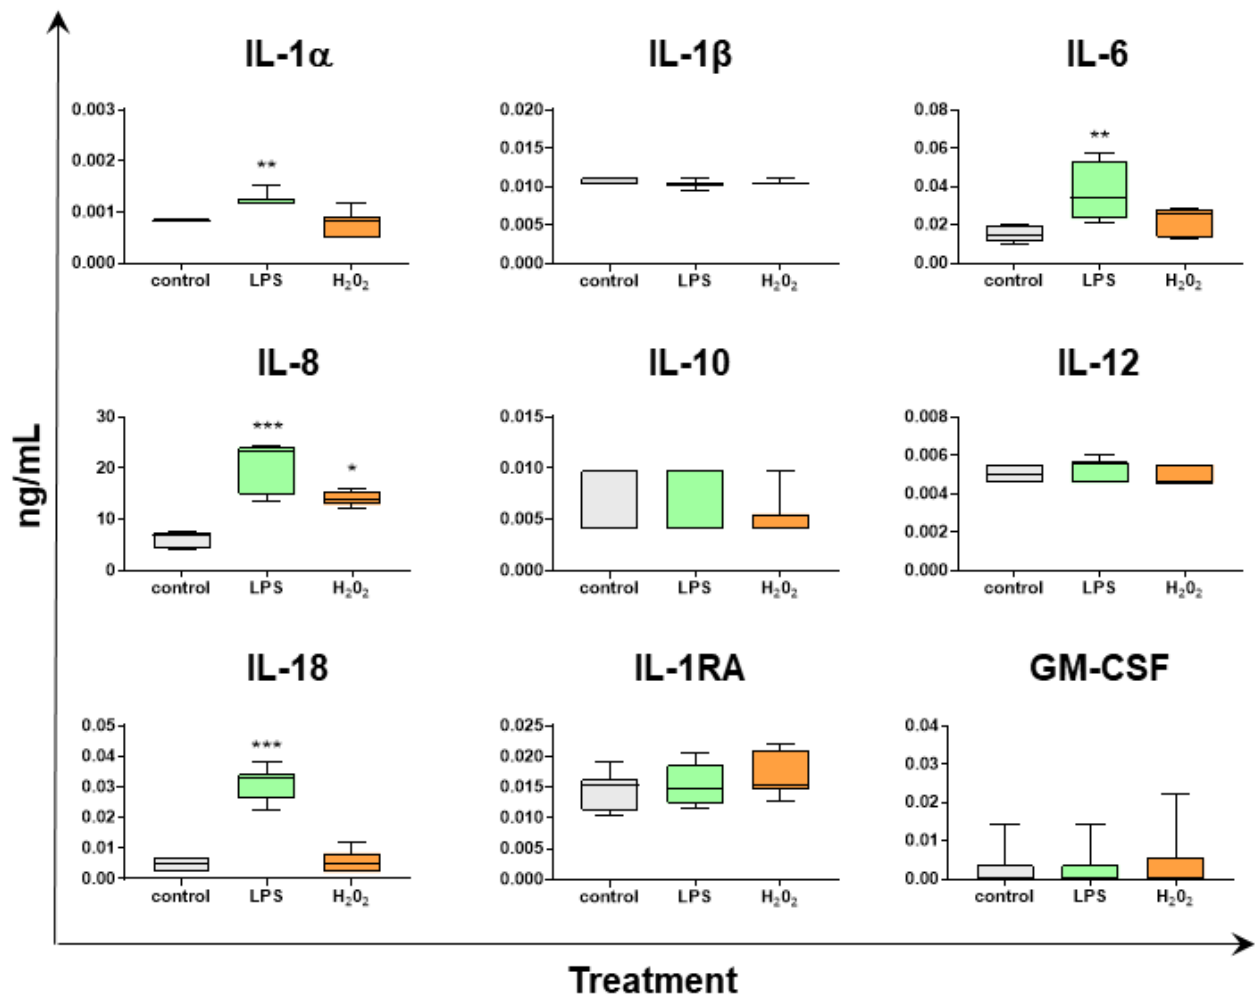

**Figure S2.** Cytokine release by IPEC-J2 after 24 h of treatment with LPS or H<sub>2</sub>O<sub>2</sub>. IPEC-J2 were left untreated (control, grey), stimulated with LPS (green) or H<sub>2</sub>O<sub>2</sub> (orange). After, culture supernatants were collected, and levels of several cytokines were determined through multiplex ELISA. Data are presented as box-and-whisker plots displaying median and interquartile range (boxes) and minimum and maximum values (whiskers). Differences (control vs LPS; control vs H<sub>2</sub>O<sub>2</sub>) were evaluated through ANOVA followed by Dunnett's multiple comparison test or a Kruskal-Wallis test followed by Dunn's multiple comparison test; \* p<0.05, \*\* p<0.01 and \*\*\* p<0.001.

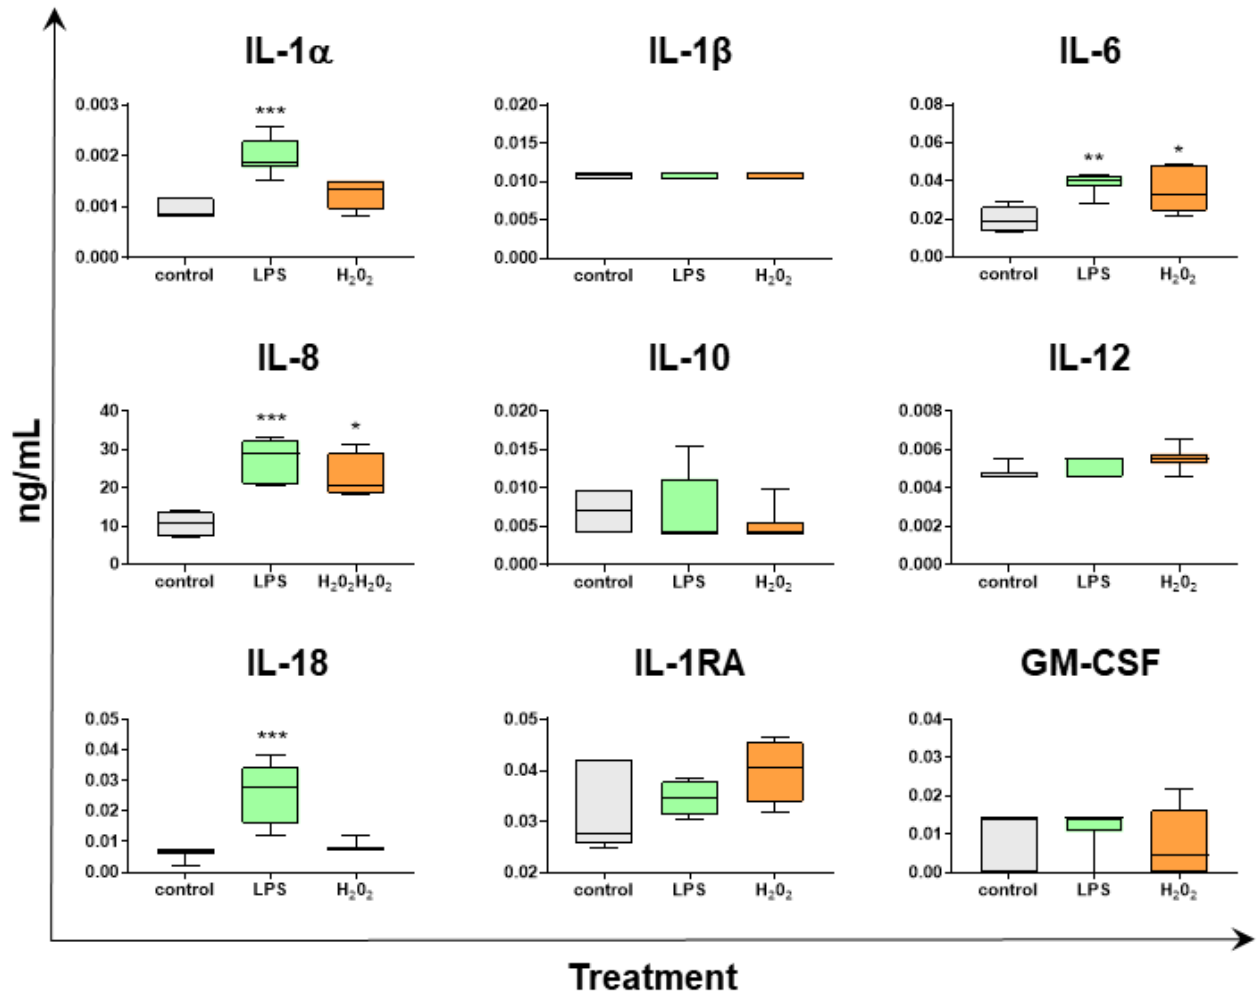

**Figure S3.** Cytokine release by IPEC-J2 after 48 h treatment with LPS or H<sub>2</sub>O<sub>2</sub>. IPEC-J2 were left untreated (control, grey), stimulated with LPS (green) or H<sub>2</sub>O<sub>2</sub> (orange). After 48 h, culture supernatants were collected, and levels of several cytokines were determined through multiplex ELISA. Data are presented as box-and-whisker plots displaying median and interquartile range (boxes) and minimum and maximum values (whiskers). Differences (control vs LPS; control vs H<sub>2</sub>O<sub>2</sub>) were evaluated through ANOVA followed by Dunnett's multiple comparison test or a Kruskal-Wallis test followed by Dunn's multiple comparison test; \* p<0.05, \*\* p<0.01 and \*\*\* p<0.001.

Table S1. Primer set sequences for target and reference genes.

| Gene          | Primer sequences                                                                           | Amplicon length | Source |
|---------------|--------------------------------------------------------------------------------------------|-----------------|--------|
| <i>IL12A</i>  | For - 5' - ATGCCTCAACCACTCCCAA - 3'<br>Rev - 5' - TGTGCTGGTTTATCTTTGGTGA - 3'              | 135             | [12]   |
| <i>IL12B</i>  | For - 5' - TCAGGGACATCATCAAACCA - 3'<br>Rev - 5' - GAACACCAAACATCAGGGAAA - 3'              | 140             | [58]   |
| <i>EBI3</i>   | For - 5' - CAACGTCACAGCCATCCAC - 3'<br>Rev - 5' - GGTTTCCACTGCACCCAA - 3'                  | 140             | [12]   |
| <i>IL6</i>    | For - 5' - TGGCTACTGCCTTCCCTACC - 3'<br>Rev - 5' - CAGAGATTTTGCCGAGGATG - 3'               | 131             | [59]   |
| <i>CXCL8</i>  | For - 5' - TTCGATGCCAGTGCATAAATA - 3'<br>Rev - 5' - CTGTACAACCTTCTGCACCCA - 3'             | 175             | [59]   |
| <i>IL18</i>   | For - 5' - CGTGTGAGGATATGCCTGATT - 3'<br>Rev - 5' - TGGTACTGCCAGACCTCTAGTGA - 3'           | 106             | [59]   |
| <i>TNFA</i>   | For - 5' - TGCCTACTGCACCTTCGAGGTTATC - 3'<br>Rev - 5' - GTGGGCGACGGGCTTATCTG - 3'          | 125             | [60]   |
| <i>TGFB1</i>  | For - 5' - CGC GTG CTA ATG GTG GAA AG - 3'<br>Rev - 5' - CCG ACG TGT TGA ACA GCA TA - 3'   | 87              | [12]   |
| <i>NOS2</i>   | For - 5' - CGTTATGCCACCAACAATGG - 3'<br>Rev - 5' - AGACCCGGAAGTCGTGCTT - 3'                | 84              | [61]   |
| <i>MUC2</i>   | For - 5' - GCAAAGACCTCTAAGATGGCC - 3'<br>Rev - 5' - AGACCACACTCAGCCTCAG - 3'               | 132             | [12]   |
| <i>MMP9</i>   | For - 5' - TGT GGA CCA GAT GTT CCC C - 3'<br>Rev - 5' - AGT CCA CCT GAT TCA CCT CG - 3'    | 130             | [12]   |
| <i>TLR1</i>   | For - 5' - AGA TTT CGT GCC ACC CTA TG - 3'<br>Rev - 5' - CCT GGG GGA TAA ACA ATG TG - 3'   | 276             | [61]   |
| <i>TLR2</i>   | For - 5' - CGG CTT CCA AGG ATG GAG AAA - 3'<br>Rev - 5' - TCC AGA GAG TTG ACC TTG CAG - 3' | 71              | [61]   |
| <i>TLR3</i>   | For - 5' - TGAAGAACTTGATTTCTTGCCA - 3'<br>Rev - 5' - GGCATGAAAACACCCTGGAG - 3'             | 93              | [61]   |
| <i>TLR4</i>   | For - 5' - TGGCAGTTTCTGAGGAGTCATG - 3'<br>Rev - 5' - CCGCAGCAGGGACTTCTC - 3'               | 71              | [59]   |
| <i>TLR5</i>   | For - 5' - TCAAAGATCCTGACCATCACA - 3'<br>Rev. - 5' - CCAGCTGTATCAGGGAGCTT - 3'             | 59              | [59]   |
| <i>TLR7</i>   | For - 5' - GTGGAAATTGCCCTCGTTGT - 3'<br>Rev - 5' - GATGGATCTGTAGGGGAGCA - 3'               | 77              | [61]   |
| <i>TLR8</i>   | For - 5' - AAGACAACCAGTTACGTGAAATACC - 3'<br>Rev - 5' - GGGTGTTAAAGATAATGACAGCAC - 3'      | 236             | [62]   |
| <i>TLR9</i>   | For - 5' - AGGACTTCATGCCAACTGC - 3'<br>Rev - 5' - CGAGCAAACATCTCCGACTG - 3'                | 90              | [61]   |
| <i>DEFB1</i>  | For - 5' - TGCCACAGGTGCCGATCT - 3'<br>Rev - 5' - CTGTTAGCTGCTTAAGGAATAAAGGC - 3'           | 80              | [59]   |
| <i>DEFB4A</i> | For - 5' - CCAGAGGTCCGACCACTA - 3'<br>Rev - 5' - GGTCCCTTCAATCCTGTT - 3'                   | 87              | [59]   |
| <i>MYD88</i>  | For - 5' - GCA GCT GGA ACA GAC CAA CT - 3'<br>Rev - 5' - GTG CCA GGC AGG ACA TCT - 3'      | 62              | [63]   |
| <i>NFKB1</i>  | For - 5' - CCCATGTAGACAGCACCATATGAT - 3'<br>Rev - 5' - ACAGAGGCTCAAAGTTCTCCACCA - 3'       | 131             | [63]   |
| <i>RELA</i>   | For - 5' - CGAGAGGAGCACGGATACCA - 3'<br>Rev - 5' - GCCCCGTGTAGCCATTGA - 3'                 | 61              | [63]   |
| <i>IFNA1</i>  | For - 5' - GGCTCTGGTGCATGAGATGC - 3'<br>Rev - 5' - GCCTTCTTCTGAATCTGTCTCA - 3'             | 546             | [64]   |

|      |              |                                                                               |    |      |
|------|--------------|-------------------------------------------------------------------------------|----|------|
|      | <i>IFNB</i>  | For - 5' - AGTTGCCTGGGACTCCTCAA - 3'<br>Rev - 5' - CTCAGGGACCTCGAAGTTCAT - 3' | 59 | [65] |
|      | <i>IRF3</i>  | For - 5' - GGGAAGGAGGCGTTCGAC - 3'<br>Rev - 5' - ACCAGAGGTGTAGCGTGGT - 3'     | 92 | [63] |
| Ref. | <i>GAPDH</i> | For - 5' - ATGGTGAAGGTCGGAGTGAA - 3'<br>Rev - 5' - AGTGGAGGTCAATGAAGGGG - 3'  | 61 | [12] |
